# Supplementary material for: The Influence of 5-HTTLPR, BDNF Rs6265 and COMT Rs4680 Polymorphisms on Impulsivity in Bipolar Disorder: The Role of Gender
Source: MDPI journal article supplement (doi:10.3390/genes13030482), 2022-03-09
Supplement: s1 [file s1]

**Table S2. Retrospective Design Analysis on the highest observed effect size (Cohen d), the ratio between the observed Standard Deviation (SDratio) and the sample size of each subgroup (n1 and n2) reporting the observed power (P) and the type M (M) and type S (S) errors. In bold the observed power greater than 60%.**

| BIS-11 Attentional |      |      |       |     |      |      |      | BIS-11 Motor |             |           |           |             |             | BIS-11 Non-planning |             |             |           |           |             | BIS-11 Total |             |             |             |           |           |             |             |             |    |   |   |   |
|--------------------|------|------|-------|-----|------|------|------|--------------|-------------|-----------|-----------|-------------|-------------|---------------------|-------------|-------------|-----------|-----------|-------------|--------------|-------------|-------------|-------------|-----------|-----------|-------------|-------------|-------------|----|---|---|---|
|                    | d    | SD   | ratio | n1  | n2   | P    | M    | S            | d           | SD        | ratio     | n1          | n2          | P                   | M           | S           | d         | SD        | ratio       | n1           | n2          | P           | M           | S         | d         | SD          | ratio       | n1          | n2 | P | M | S |
| 5-HTTLPR *         | 0.53 | 1.61 | 49    | 20  | 0.58 | 1.31 | 0.00 | <b>0.68</b>  | <b>0.97</b> | <b>32</b> | <b>20</b> | <b>0.64</b> | <b>1.27</b> | <b>0.00</b>         | 0.31        | 1.19        | 64        | 46        | 0.37        | 1.63         | 0.00        | <b>0.80</b> | <b>1.61</b> | <b>49</b> | <b>20</b> | <b>0.91</b> | <b>1.07</b> | <b>0.00</b> |    |   |   |   |
| Gender             |      |      |       |     |      |      |      |              |             |           |           |             |             |                     |             |             |           |           |             |              |             |             |             |           |           |             |             |             |    |   |   |   |
| BDNF               | 0.28 | 0.55 | 14    | 80  | 0.22 | 2.11 | 0.01 | 0.34         | 0.59        | 14        | 131       | 0.34        | 1.69        | 0.01                | <b>0.62</b> | <b>0.54</b> | <b>14</b> | <b>80</b> | <b>0.75</b> | <b>1.16</b>  | <b>0.00</b> | <b>0.85</b> | <b>0.55</b> | <b>14</b> | <b>80</b> | <b>0.95</b> | <b>1.04</b> | <b>0.00</b> |    |   |   |   |
| COMT               | 0.10 | 0.73 | 50    | 100 | 0.10 | 4.07 | 0.07 | 0.11         | 0.73        | 50        | 100       | 0.11        | 3.59        | 0.05                | 0.18        | 0.82        | 75        | 100       | 0.21        | 2.20         | 0.00        | 0.16        | 0.73        | 50        | 100       | 0.18        | 2.50        | 0.01        |    |   |   |   |
