# Supplementary material for: The Influence of 5-HTTLPR, BDNF Rs6265 and COMT Rs4680 Polymorphisms on Impulsivity in Bipolar Disorder: The Role of Gender
Source: MDPI journal article supplement (doi:10.3390/genes13030482), 2022-03-09
Supplement: s1 [file s1]

## Supplementary Figures

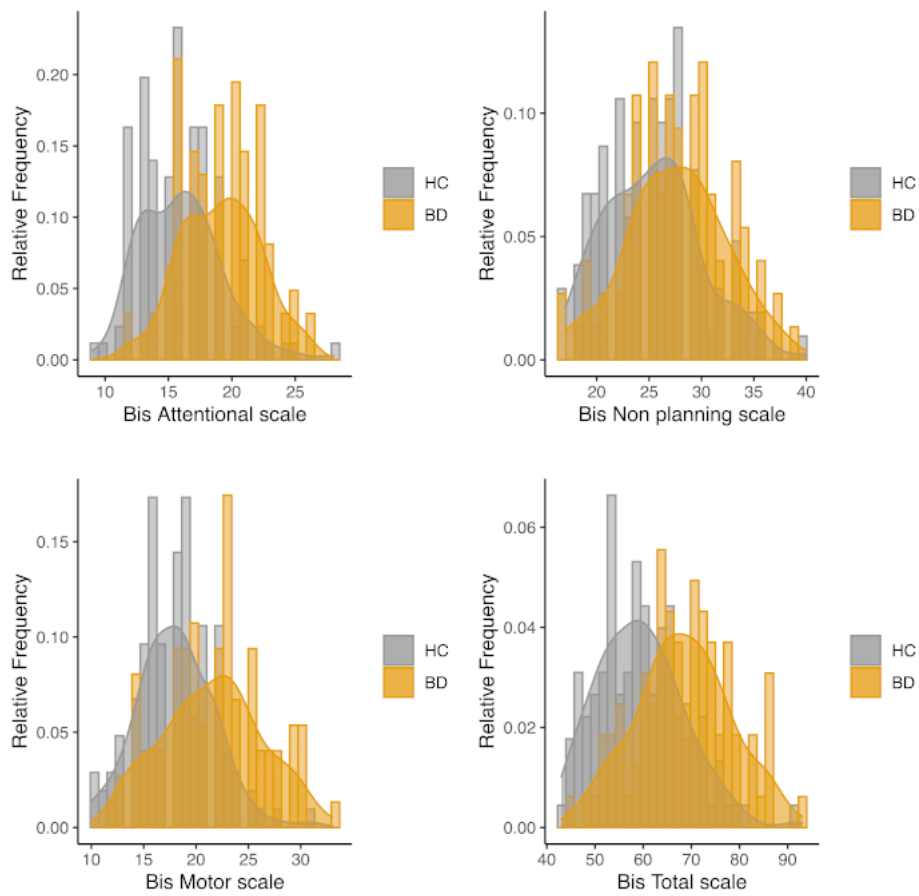

Figure S1: Distribution of BIS-11 score (Attentional, Motor, Non-planning and Total) among HC (Healthy Controls) and BD (Bipolar Disorder)

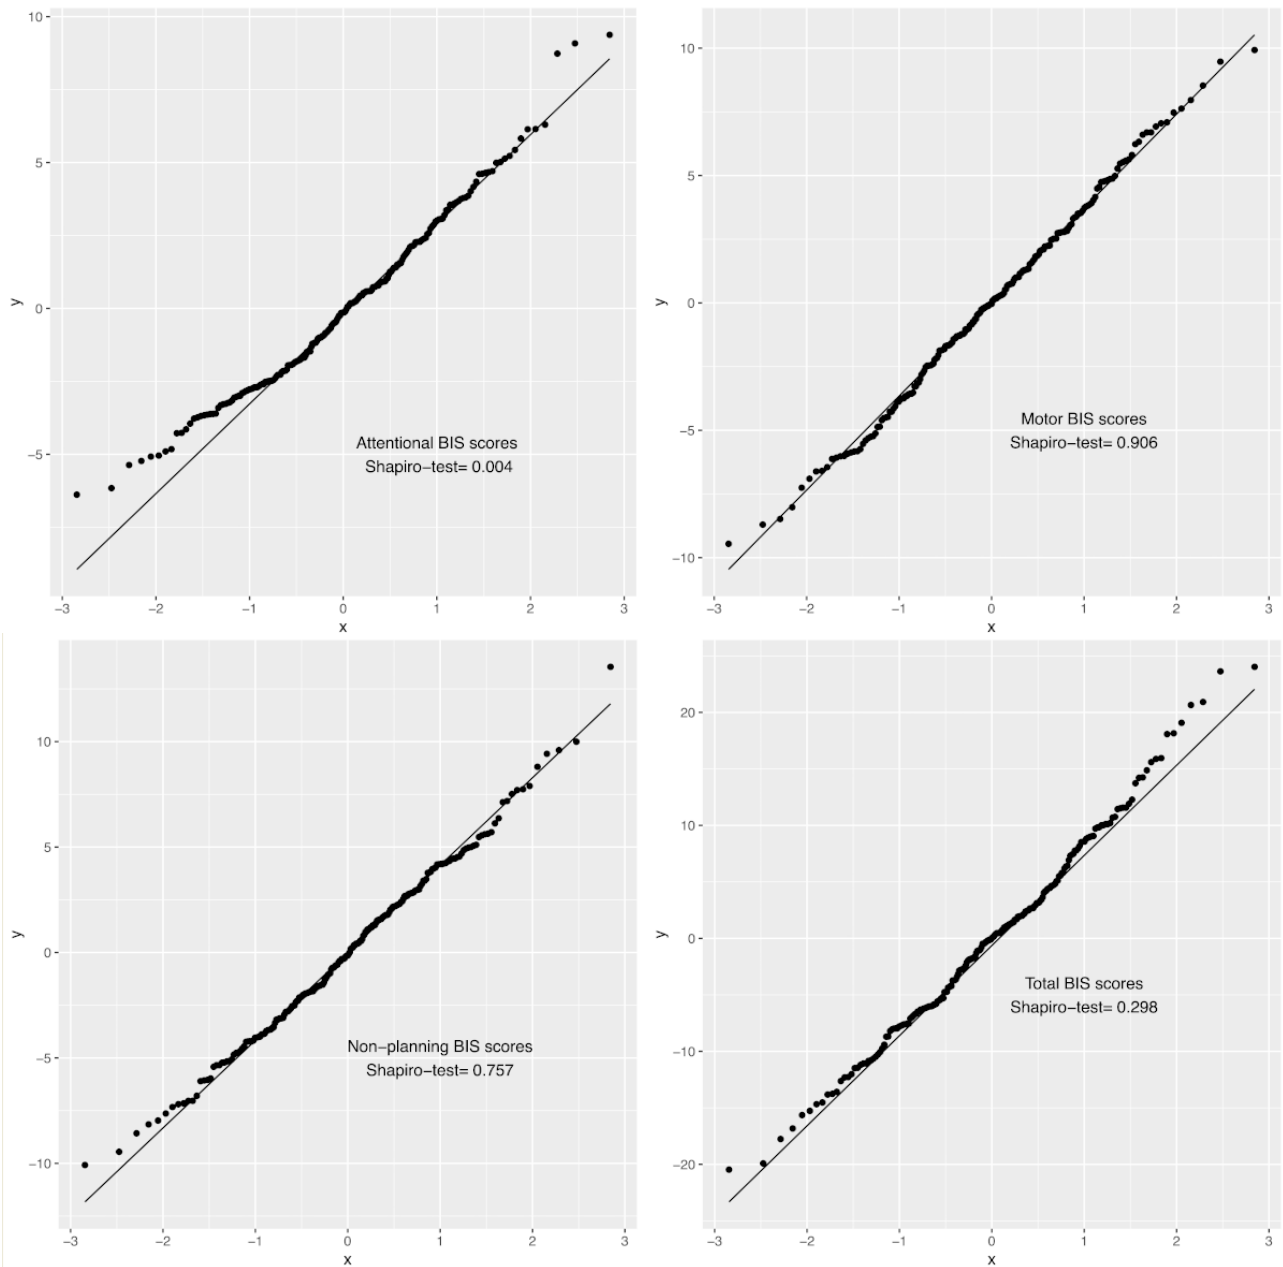

Figure S2. Quantile-quantile diagram for each mixed-effects regression model and p-value of the Shapiro test.
