# Supplementary material for: The Influence of 5-HTTLPR, BDNF Rs6265 and COMT Rs4680 Polymorphisms on Impulsivity in Bipolar Disorder: The Role of Gender
Source: MDPI journal article supplement (doi:10.3390/genes13030482), 2022-03-09
Supplement: s1 [file s1]

**Table S1. Coefficients ( $\beta$ ) and relative 95% Interval Confidence estimated by the mixed-effects regression model considering as dependent variable the attentional, motor, non-planning, and total BIS score with respect to the reference category\*.**

| <i>Predictors</i>                                    | BIS attentional |               |                  | BIS motor |               |                  | BIS non-planning |               |                  | BIS total |               |                  |
|------------------------------------------------------|-----------------|---------------|------------------|-----------|---------------|------------------|------------------|---------------|------------------|-----------|---------------|------------------|
|                                                      | $\beta$         | 95% CI        | P-value          | $\beta$   | 95% CI        | P-value          | $\beta$          | 95% CI        | P-value          | $\beta$   | 95% CI        | P-value          |
| (Intercept)                                          | 17.7            | 16.1 – 19.3   | <b>&lt;0.001</b> | 20.3      | 18.1 – 22.4   | <b>&lt;0.001</b> | 28.7             | 26.2 – 31.2   | <b>&lt;0.001</b> | 65.7      | 61.1 – 70.3   | <b>&lt;0.001</b> |
| Disease [BD]                                         | 1.95            | 0.92 – 2.98   | <b>&lt;0.001</b> | 2.26      | 0.92 – 3.60   | <b>0.001</b>     | 1.21             | -0.29 – 2.70  | 0.113            | 5.35      | 2.40 – 8.30   | <b>&lt;0.001</b> |
| Gender [Female]                                      | -0.39           | -1.55 – 0.77  | 0.509            | -1.09     | -2.62 – 0.44  | 0.160            | -2.42            | -4.12 – -0.72 | <b>0.006</b>     | -3.34     | -6.67 – -0.01 | <b>0.050</b>     |
| Age class [31.7-47]                                  | 0.47            | -0.60 – 1.53  | 0.389            | -0.41     | -2.20 – 1.39  | 0.656            | 0.99             | -0.58 – 2.56  | 0.214            | 2.22      | -0.84 – 5.27  | 0.154            |
| Age class [48-73]                                    | 0.21            | -0.95 – 1.38  | 0.717            | 1.01      | -0.86 – 2.89  | 0.288            | 0.98             | -0.72 – 2.67  | 0.258            | 2.16      | -1.17 – 5.49  | 0.202            |
| Raven IQ scale [115-127]                             | -0.63           | -1.64 – 0.38  | 0.222            | -1.47     | -2.81 – -0.14 | <b>0.030</b>     | -0.45            | -1.91 – 1.01  | 0.545            | -2.68     | -5.58 – 0.23  | 0.071            |
| Raven IQ scale [128-128]                             | -0.52           | -1.85 – 0.82  | 0.446            | -0.51     | -2.30 – 1.28  | 0.573            | -0.79            | -2.72 – 1.15  | 0.423            | -1.80     | -5.62 – 2.02  | 0.355            |
| Educational level [14-18]                            | -1.10           | -2.14 – -0.06 | <b>0.038</b>     | -0.57     | -1.94 – 0.79  | 0.407            | -1.25            | -3.30 – 0.80  | 0.232            | -2.91     | -5.87 – 0.06  | 0.054            |
| Educational level [19-26]                            | -1.62           | -2.98 – -0.27 | <b>0.019</b>     | -1.15     | -2.92 – 0.63  | 0.204            | -2.81            | -5.57 – -0.06 | <b>0.045</b>     | -4.00     | -7.86 – -0.14 | <b>0.043</b>     |
| COMT [AA]                                            | -0.81           | -1.87 – 0.24  | 0.132            | -1.08     | -2.47 – 0.31  | 0.126            | -0.03            | -2.36 – 2.30  | 0.981            | -2.29     | -5.31 – 0.73  | 0.136            |
| COMT [GG]                                            | -0.14           | -1.08 – 0.80  | 0.769            | -0.39     | -1.62 – 0.84  | 0.534            | -1.87            | -3.96 – 0.21  | 0.078            | -0.88     | -3.57 – 1.82  | 0.522            |
| X5.HTTLP [LL]                                        | 0.30            | -1.09 – 1.68  | 0.675            | -0.40     | -2.22 – 1.42  | 0.665            | -2.11            | -4.12 – -0.11 | <b>0.039</b>     | -1.59     | -5.57 – 2.39  | 0.431            |
| X5.HTTLP [SS]                                        | -1.42           | -3.25 – 0.42  | 0.129            | -0.25     | -2.66 – 2.17  | 0.841            | -2.02            | -4.66 – 0.61  | 0.131            | -4.16     | -9.42 – 1.10  | 0.120            |
| BDNF [TC]                                            | 0.32            | -0.55 – 1.20  | 0.468            | -1.32     | -3.23 – 0.59  | 0.175            | 0.22             | -1.06 – 1.51  | 0.730            | 0.86      | -1.65 – 3.36  | 0.501            |
| BDNF [TT]                                            | -1.85           | -3.57 – -0.12 | <b>0.036</b>     | -4.00     | -7.75 – -0.25 | <b>0.037</b>     | -5.68            | -8.17 – -3.19 | <b>&lt;0.001</b> | -10.2     | -15.2 – -5.31 | <b>&lt;0.001</b> |
| X5.HTTLP [LL]*Gender [F]                             | -0.09           | -1.90 – 1.73  | 0.925            | 1.53      | -0.87 – 3.94  | 0.210            | 1.89             | -0.77 – 4.55  | 0.162            | 2.43      | -2.77 – 7.63  | 0.359            |
| X5.HTTLP [SS]*Gender [F]                             | 3.82            | 1.43 – 6.22   | <b>0.002</b>     | 4.03      | 0.89 – 7.17   | <b>0.012</b>     | 4.02             | 0.59 – 7.44   | <b>0.022</b>     | 12.0      | 5.16 – 18.9   | <b>0.001</b>     |
| BDNF [TC]*Age class [31.7-47]                        |                 |               |                  | 3.80      | 1.11 – 6.49   | <b>0.006</b>     |                  |               |                  |           |               |                  |
| BDNF [TT]*Age class [31.7-47]                        |                 |               |                  | 1.24      | -4.31 – 6.78  | 0.660            |                  |               |                  |           |               |                  |
| BDNF [TC]*Age class [48-73]                          |                 |               |                  | 0.13      | -2.66 – 2.92  | 0.928            |                  |               |                  |           |               |                  |
| BDNF [TT]*Age class [48-73]                          |                 |               |                  | 2.77      | -2.58 – 8.11  | 0.308            |                  |               |                  |           |               |                  |
| COMT [AA]*Educational level [14-18]                  |                 |               |                  |           |               |                  | -0.80            | -4.18 – 2.59  | 0.643            |           |               |                  |
| COMT [GG]*Educational level [14-18]                  |                 |               |                  |           |               |                  | 1.24             | -1.82 – 4.31  | 0.425            |           |               |                  |
| COMT [AA]*Educational level [19-26]                  |                 |               |                  |           |               |                  | -0.60            | -4.63 – 3.44  | 0.771            |           |               |                  |
| COMT [GG]*Educational level [19-26]                  |                 |               |                  |           |               |                  | 5.30             | 1.60 – 8.99   | <b>0.005</b>     |           |               |                  |
| $\sigma^2$                                           |                 | 8.97          |                  |           | 15.47         |                  |                  | 18.22         |                  |           | 74.08         |                  |
| $\tau_{00}$                                          |                 | 0.19 centro   |                  |           | 0.00 centro   |                  |                  | 0.84 centro   |                  |           | 0.54 centro   |                  |
| ICC                                                  |                 | 0.02          |                  |           | 0.00          |                  |                  | 0.04          |                  |           | 0.01          |                  |
| N                                                    |                 | 8 centro      |                  |           | 8 centro      |                  |                  | 8 centro      |                  |           | 8 centro      |                  |
| Observations                                         |                 | 225           |                  |           | 225           |                  |                  | 225           |                  |           | 225           |                  |
| Marginal R <sup>2</sup> / Conditional R <sup>2</sup> |                 | 0.281 / 0.296 |                  |           | 0.283 / 0.283 |                  |                  | 0.230 / 0.264 |                  |           | 0.331 / 0.336 |                  |

\* reference category: Disease [HC], Gender [Male], Age-class [<31.7], Raven IQ scale [<115], Educational level [<14], COMT [AG], X5.HTTLP [LS], BDNF [CC].
